# Supplementary material
Source: publisher site journal article supplement (http://www.kjim.org/upload/media/kjim-2021-069-suppl6.pdf)
Supplement: Supplementary file 1 [file kjim-2021-069-suppl6.pdf]

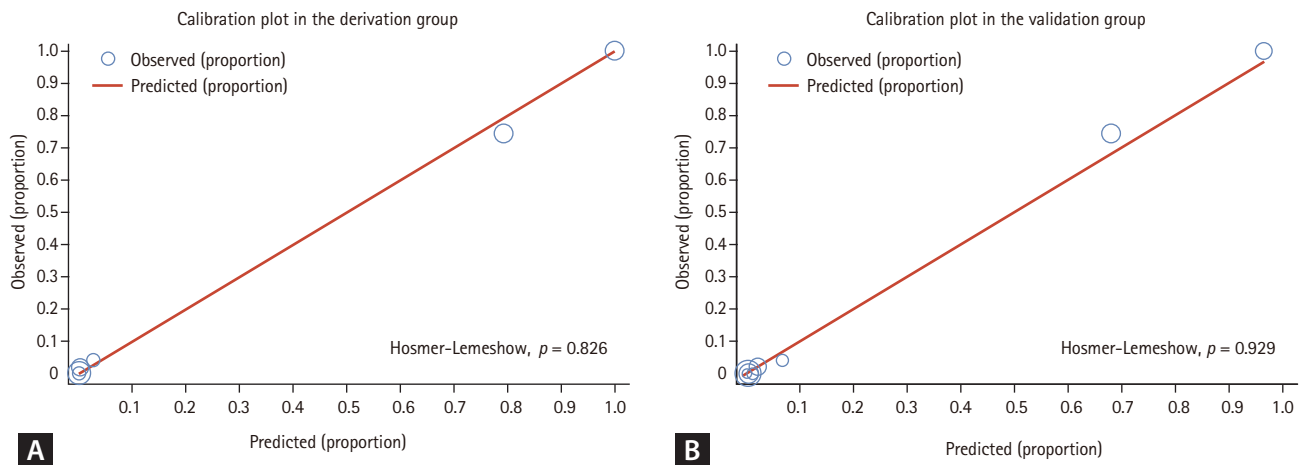

**Supplementary Figure 2.** Calibration plots of Acute Eosinophilic Pneumonia Diagnostic Index in Military Smokers (ADIMS) according to the (A) derivation and (B) validation groups. The calibration plots show that the model fitted well in both the derivation and validation groups.
